# Supplementary material for: The Influence of Isoflurane Anaesthesia on the Rat Grimace Scale
Source: PLoS One. 2016 Nov 17;11(11):e0166652. doi: 10.1371/journal.pone.0166652 (PMC5114010; doi:10.1371/journal.pone.0166652)
Supplement: S1 File — (XLSX) [file pone.0166652.s001.xlsx]

## Sheet: S1 File
Short duration	Day	Cage	Rat	Treatment group	Mean		Long Duration	Cage	Rat	Treatment group	Mean day 1	Mean day 2	Mean day 3	Mean day 4
	1	1	1	1	3.33333			2	1	1	1.33	1.5	1	1.33
	1	1	2	1	5.33333			2	2	1	2.33	1.83	1.17	1.33
	1	1	3	1	2.33333			2	3	1	0.5	2.67	1	1.5
	1	1	4	1	1.33333			2	4	1	2.33	3.33	1.83	1.5
	1	2	1	2	1			4	1	1	2.17	2.67	2.5	1.17
	1	2	2	2	2			4	2	1	1.67	2.17	2.17	2
	1	2	3	2	0.333333			4	3	1	2.5	2	3.33	2.67
	1	2	4	2	1.33333			4	4	1	1.33	2.5	1.5	2.83
	1	4	1	2	1.66667			5	1	1	2.5	1.67	1.67	1.67
	1	4	2	2	3.33333			5	2	1	2.33	3.83	2.17	1.33
	1	4	3	2	3			5	3	1	1.5	1.17	1	1.67
	1	4	4	2	1.66667			5	4	1	1.83	1.33	1.5	1.67
	1	6	1	1	1			1	1	2	2.33	3.5	3.17	2.33
	1	6	2	1	2.33333			1	2	2	2.33	1.5	3.33	1.33
	1	6	3	1	2.33333			1	3	2	2	3.17	2.67	3.17
	1	6	4	1	0.666667			1	4	2	1.17	2.17	1.5	3.17
	1	8	1	1	2.66667			3	1	2	2.5	2.33	1.67	1.67
	1	8	2	1	3.33333			3	2	2	2.83	1.5	2.33	2.5
	1	8	3	1	0.666667			3	3	2	3	2.33	3.5	2
	1	8	4	1	0.666667			3	4	2	1.33	3.33	1	3.17
	1	9	1	2	0.666667			6	1	2	2.83	3.33	3.17	3.67
	1	9	2	2	3.33333			6	2	2	3.5	3	1.67	2.17
	1	9	3	2	3.66667			6	3	2	2.83	1.67	2.5	1.5
	1	9	4	2	1.33333			6	4	2	2.67	3.17	2.67	1.5
	2	1	1	1	4.66667
	2	1	2	1	1.66667
	2	1	3	1	1.66667
	2	1	4	1	1.66667
	2	2	1	2	0.333333
	2	2	2	2	2.66667
	2	2	3	2	2.33333
	2	2	4	2	1
	2	4	1	2	2.33333
	2	4	2	2	3.33333
	2	4	3	2	4.33333
	2	4	4	2	0.666667
	2	6	1	1	3.33333
	2	6	2	1	0.666667
	2	6	3	1	1
	2	6	4	1	1
	2	8	1	1	4
	2	8	2	1	1
	2	8	3	1	1.66667
	2	8	4	1	2.33333
	2	9	1	2	2
	2	9	2	2	0.333333
	2	9	3	2	4.66667
	2	9	4	2	0.333333
	3	1	1	1	5
	3	1	2	1	6
	3	1	3	1	2.66667
	3	1	4	1	1
	3	2	1	2	1.33333
	3	2	2	2	2.33333
	3	2	4	2	2
	3	4	1	2	2.66667
	3	4	2	2	0.666667
	3	4	3	2	3
	3	4	4	2	4.66667
	3	6	1	1	1
	3	6	2	1	1.33333
	3	6	3	1	0
	3	6	4	1	0
	3	8	1	1	4.66667
	3	8	2	1	3
	3	8	3	1	2.66667
	3	8	4	1	4.66667
	3	9	1	2	1.33333
	3	9	2	2	0
	3	9	3	2	4.33333
	3	9	4	2	1.33333
	4	1	1	1	3.33333
	4	1	2	1	4.66667
	4	1	3	1	3.33333
	4	1	4	1	0.666667
	4	2	1	2	1
	4	2	2	2	2
	4	2	3	2	2.66667
	4	2	4	2	0.666667
	4	4	1	2	2.33333
	4	4	2	2	2.33333
	4	4	3	2	3
	4	4	4	2	1.66667
	4	6	1	1	3
	4	6	2	1	1.33333
	4	6	3	1	2.66667
	4	6	4	1	2.33333
	4	8	1	1	5.66667
	4	8	2	1	1
	4	8	3	1	0.666667
	4	8	4	1	0.666667
	4	9	1	2	1
	4	9	2	2	1.66667
	4	9	3	2	4
	4	9	4	2	1.33333
